# Supplementary material for: In Vitro Screening of a 1280 FDA-Approved Drugs Library against Multidrug-Resistant and Extensively Drug-Resistant Bacteria
Source: MDPI journal article supplement (doi:10.3390/antibiotics11030291), 2022-02-22
Supplement: s1 [file s1]

|                            | Therapeutic class | Hits except "infectiology" class | PM g/mol | Tested C° in mg/l (=10 µmol/l) |            | Data from in vivo studies                                                                                                                               | References |
|----------------------------|-------------------|----------------------------------|----------|--------------------------------|------------|---------------------------------------------------------------------------------------------------------------------------------------------------------|------------|
| <i>S. aureus</i><br>P1943  | Cardiovascular    | Dronedarone hydrochloride        | 593.2    | 5.9                            |            | Steady-state plasma concentrations of <b>84 to 167 ng/mL (84/167 µg/l)</b> . with 400 mg twice daily                                                    | [22]       |
|                            | Dermatology       | Thonzonium bromide               | 591.7    | 5.9                            |            | <i>external use in an antibiotic suspension. any data about serum concentration</i>                                                                     |            |
|                            | Metabolism        | Auranofin                        | 679.5    | 6.8                            |            | Cmax: <b>0.025 µg/ml (0.025 mg/l)</b> . after 6mg per day                                                                                               | [39]       |
|                            | Neuromuscular     | Pinaverium bromide               | 591.4    | 5.9                            |            | Cmax: <b>3.609.98 pg/mL (3.6 µg/l)</b> for 100 mg. with a bioavailability very low                                                                      | [70]       |
|                            | Oncology          | 5-fluorouracil                   | 130.0    | 1.3                            |            | Cmax: between <b>393.8 - 487 ng/ml (440.4 µg/l)</b> for a dose of 50 mg/kg                                                                              | [71]       |
|                            |                   | Carmofur                         | 257.3    | 2.6                            |            | Serum concentration: lower than <b>0.02 µg/ml (0.02 mg/l)</b> . with daily administrations of 600 mg for more than 28 days                              | [72]       |
|                            |                   | Gemcitabine                      | 263.2    | 2.6                            | Go further | Cmax: <b>40.9 µg/ml (40.9 mg/l)</b> with administration of 2000mg/m <sup>2</sup> or <b>7.71 µmol/ml (2 mg/l)</b> with infusion at 600 mg/m <sup>2</sup> | [24,25]    |
| <i>E. faecium</i><br>P5015 | Cardiovascular    | Amiodarone                       | 645.3    | 6.5                            | Go further | Cmax: <b>1.17 mg/ml (1.17 g/l)</b> . after oral dose of 600 mg                                                                                          | [73]       |
|                            |                   | Dronedarone hydrochloride        | 593.2    | 5.9                            |            | Steady-state plasma concentrations of <b>84 to 167 ng/mL (84/167 µg/l)</b> . with 400 mg twice daily                                                    | [22]       |
|                            | Endocrinology     | Clomiphene citrate (Z.E)         | 405.96   | 4.1                            |            | Cmax: <b>15 ng/mL (15 µg/l)</b> after single oral dose of 50 mg                                                                                         | [74]       |
|                            | Metabolism        | Auranofin                        | 680.5    | 6.8                            |            | Cmax: <b>0.025 µg/ml (0.025 mg/l)</b> . after 6mg per day                                                                                               | [39]       |
|                            | Oncology          | Tamoxifen citrate                | 371.5    | 3.7                            |            | Cmax: <b>368 nmol/l (136.7 µg/l)</b> for a dose of 20 mg                                                                                                | [75]       |
|                            |                   | Gemcitabine                      | 263.2    | 2.6                            | Go further | Cmax: <b>40.9 µg/ml (40.9 mg/l)</b> with administration of 2000mg/m <sup>2</sup> or <b>7.71 µmol/ml (2 mg/l)</b> with infusion at 600 mg/m <sup>2</sup> | [24,25]    |
|                            |                   | Carmofur                         | 257.3    | 2.6                            |            | Serum concentration: lower than <b>0.02 µg/ml (0.02 mg/l)</b> . with daily administrations of 600 mg for more than 28 days                              | [72]       |
|                            |                   | Floxuridine                      | 249.2    | 2.5                            |            | Cmax: <b>4.90 ng/ml (4.90 µg/l)</b> . 400 mg three times daily. If haemodialysis. less.                                                                 | [24]       |
|                            |                   | Pemetrexed disodium              | 470.4    | 4.7                            | Go further | Cmax: <b>119 µg/mL (119 mg/l)</b> for 500 mg/m <sup>2</sup> by infusion                                                                                 | [76]       |

|                              |                        |                             |       |     |  |                                                                                         |      |
|------------------------------|------------------------|-----------------------------|-------|-----|--|-----------------------------------------------------------------------------------------|------|
|                              |                        | Raltitrexed                 | 458.0 | 4.6 |  | Cmax: <b>652.9 ng/ml (0.6 mg/l)</b> with single intravenous dose of 3 mg/m <sup>2</sup> | [77] |
|                              |                        | 5-fluorouracil              | 130.0 | 1.3 |  | Cmax: between <b>393.8 - 487 ng/ml (440.4 µg/l)</b> for a dose of 50 mg/kg              | [71] |
|                              |                        | Amethopterin (Methotrexate) | 454.4 | 4.5 |  | Cmax: <b>0.01 - 0.1 µmol/l (4.5 - 45.4 µg/l)</b> with oral doses of 10-15 µg            | [78] |
| <i>E. coli</i><br>DSM 105182 | Central Nervous System | Azaperone                   | 327.4 | 3.3 |  | <i>veterinary drug. no PK data on humans</i>                                            |      |
|                              |                        | Lomerizine hydrochloride    | 468.5 | 4.7 |  | Cmax: <b>9.06 µg/l</b> after a dose of 10mg                                             | [46] |
| <i>P. nosoerga</i><br>p8103  | Hematology             | Deferoxamine mesylate       | 560.7 | 5.6 |  | Cmax: <b>80 - 130 pmol/L (44.8 - 728.9 ng/l)</b> with IV bolus of 10 mg/kg              | [26] |
